# Supplementary material for: Highly stretchable, high efficiency room temperature self-healing polyurethane adhesive based on hydrogen bonds – applicable to solid rocket propellants
Source: Royal Society of Chemistry journal article supplement (doi:10.1039/d1py00439e), 2021-01-01
Supplement: d1py00439e1.pdf [file d1py00439e1.pdf]

Supporting Information

**High stretchability, high room temperature self-healing efficiency  
polyurethane adhesive based on hydrogen bond - can be applied to  
solid rocket propellant**

**Tu Jing, Xu Heng, Xiang Guifeng, Chen Ling, Li Pingyun\*, Guo Xiaode\***

National Special Superfine Powder Engineering Research Center of China

Nanjing University of Science and Technology

Nanjing, Jiangsu 210094, P. R. China

E-mail: lpyljr@126.com

National Special Superfine Powder Engineering Research Center of China Nanjing University of  
Science and Technology Nanjing, Jiangsu 210094, P. R. China

E-mail: guoxiaodenj@sina.com

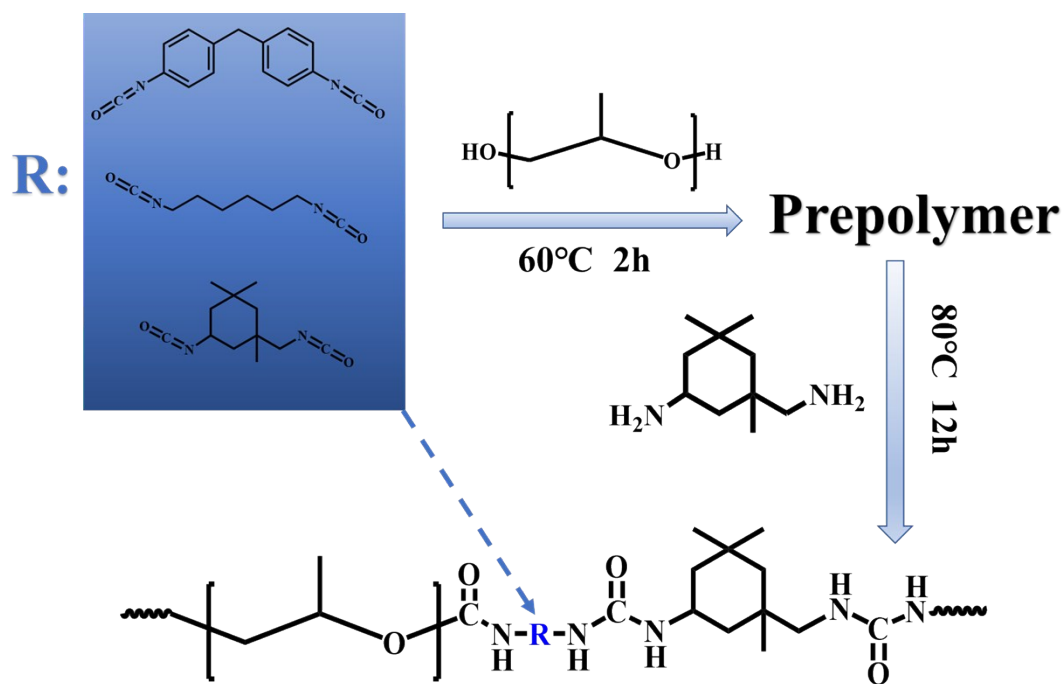

Fig. S1 The chemical structure of substances synthesized in different steps.

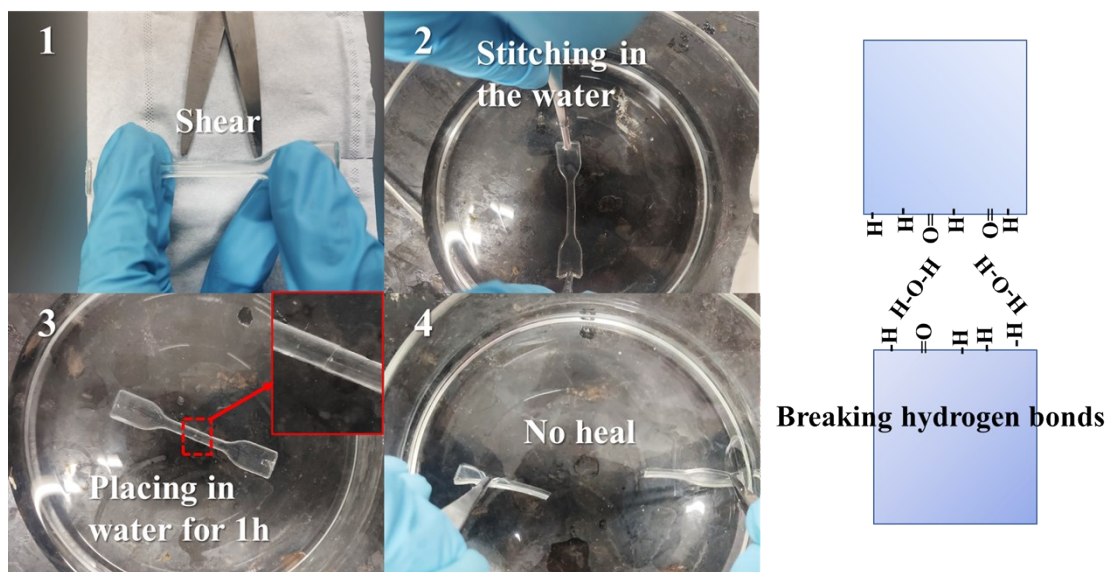

Fig. S2 The poor self-healing ability of PPG-IP-PA in water.

Table.S1 Molecular weight information of PPG-HD-PA, PPG-IP-PA, PPG-MD-PA.

|           | Mn (*10 <sup>4</sup> g/mol) | Mw (*10 <sup>4</sup> g/mol) | PD (Mw/Mn) |
|-----------|-----------------------------|-----------------------------|------------|
| PPG-HD-PA | 6.5                         | 13.6                        | 2.09       |
| PPG-IP-PA | 3.4                         | 6.0                         | 1.78       |
| PPG-MD-PA | 5.6                         | 12.5                        | 2.24       |

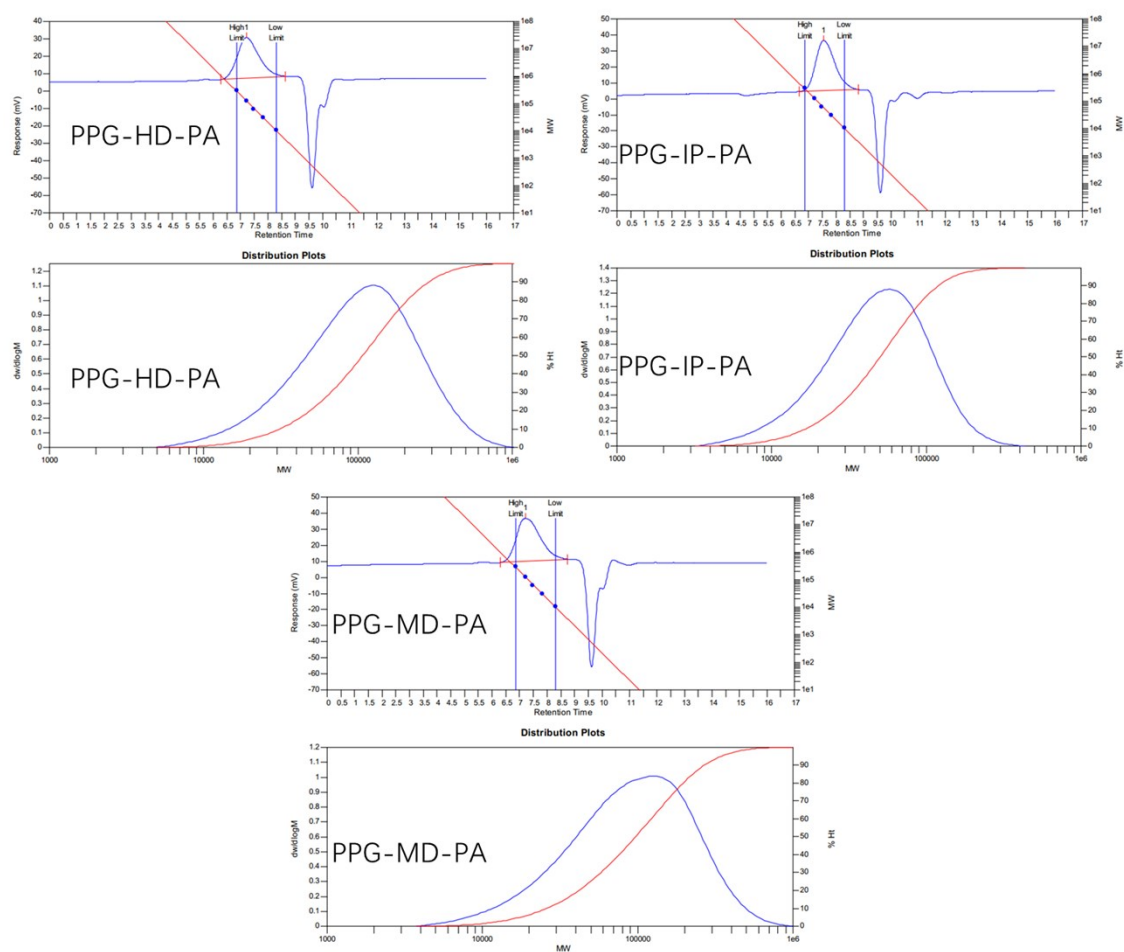

**Fig. S3 GPC results of PPG-HD-PA, PPG-IP-PA, PPG-MD-PA.**

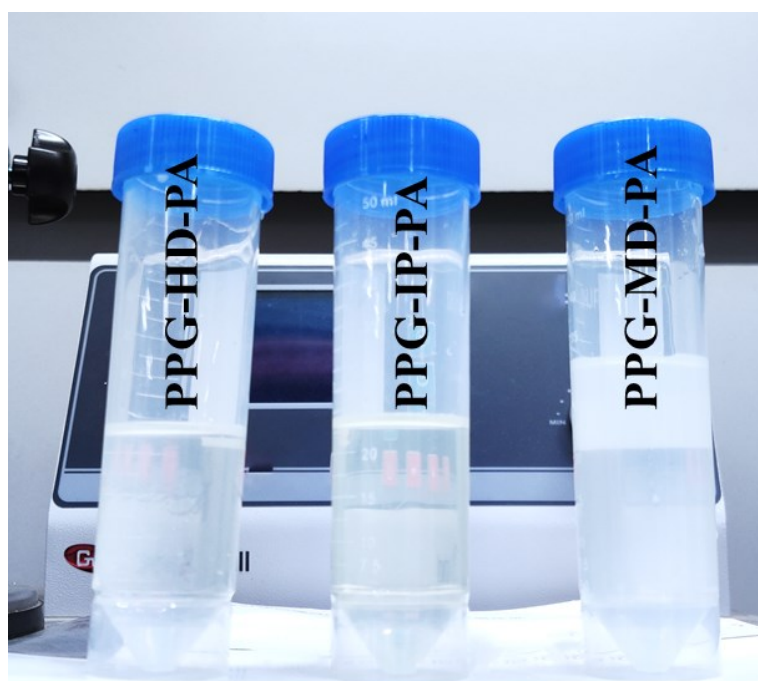

**Fig. S4 The DMF solution of PPG-HD-PA, PPG-IP-PA, PPG-MD-PA.**

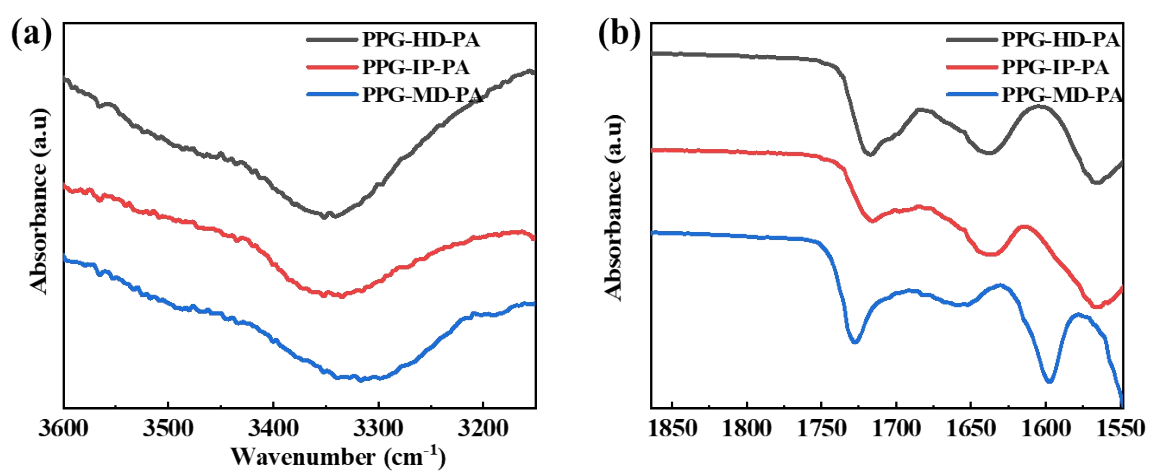

Fig. S5 Infrared vibration details of PPG-HD-PA, PPG-IP-PA, PPG-MD-PA in about 3300  $\text{cm}^{-1}$  and 1650-1720  $\text{cm}^{-1}$ .

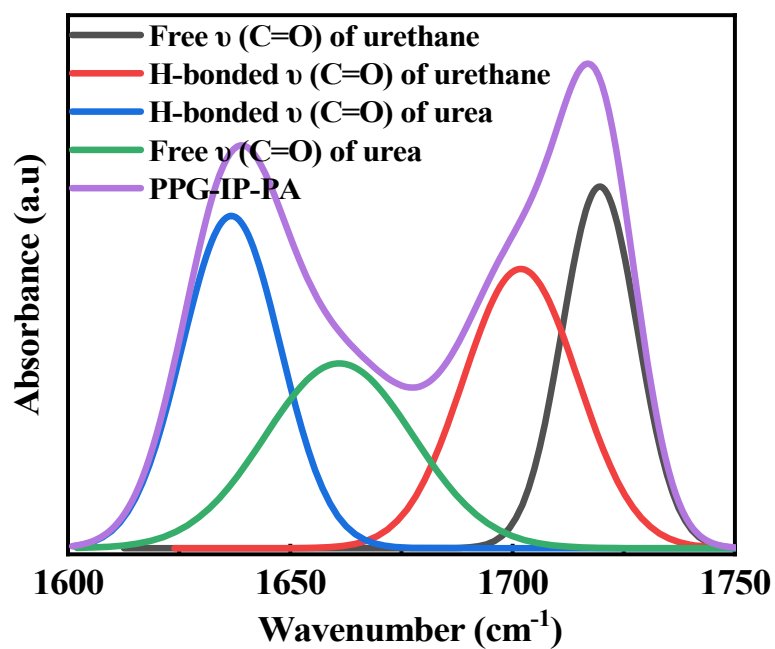

Fig. S6 The influence of PPG-IP-PA hydrogen bond on C=O Stretching vibration.

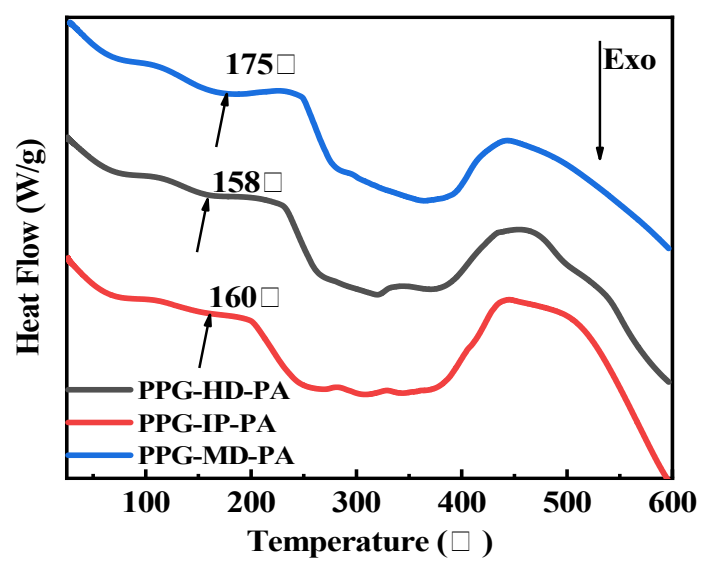

Fig. S7 DSC curves of three polyurethanes.

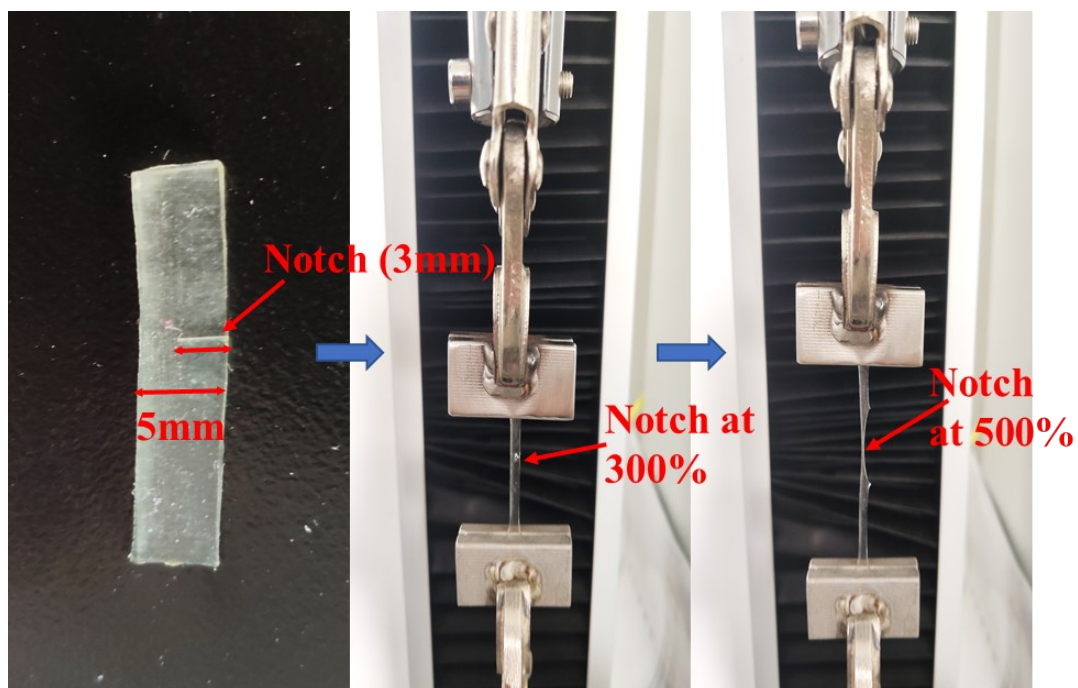

Fig. S8 PPG-IP-PA was insensitive for the wound.

| Code | Paper title                                                                                                                                                                                                                           |
|------|---------------------------------------------------------------------------------------------------------------------------------------------------------------------------------------------------------------------------------------|
| A    | Superior toughness and fast self-healing at room temperature engineered by transparent elastomers ( <i>Advanced Materials</i> )                                                                                                       |
| B    | Transparent, mechanically strong, extremely tough, self-recoverable, healable supramolecular elastomers facilely fabricated via dynamic hard domains design for multifunctional applications ( <i>Advanced Functional Materials</i> ) |
| C    | Waterproof, highly tough, and fast self-healing polyurethane for durable electronic skin ( <i>Acs Appl Mater Interfaces</i> )                                                                                                         |
| D    | Tough and water-insensitive self-healing elastomer for robust electronic skin ( <i>Advanced Materials</i> )                                                                                                                           |
| E    | Synergy between dynamic covalent boronic ester and boron–nitrogen coordination: strategy for self-healing polyurethane elastomers at room temperature with unprecedented mechanical properties ( <i>Materials Horizons</i> )          |
| F    | Water-enabled room-temperature self-healing and recyclable polyurea materials with super-strong strength, toughness, and large stretchability ( <i>Acs Appl Mater Interfaces</i> )                                                    |
| G    | Thermodynamically stable whilst kinetically labile coordination bonds lead to strong and tough self-healing polymers ( <i>Nature Communication</i> )                                                                                  |
| H    | A highly efficient self-healing elastomer with unprecedented mechanical ( <i>Advanced Materials</i> )                                                                                                                                 |
| I    | A self-reinforcing and self-healing elastomer with high strength, unprecedented toughness and room-temperature reparability ( <i>Materials Horizons</i> )                                                                             |
| J    | A highly stretchable, transparent, notch-insensitive self-healing elastomer for coating ( <i>Journal of Materials Chemistry C</i> )                                                                                                   |

Fig. S9 The detail of literature corresponding to the number in Fig.6c.

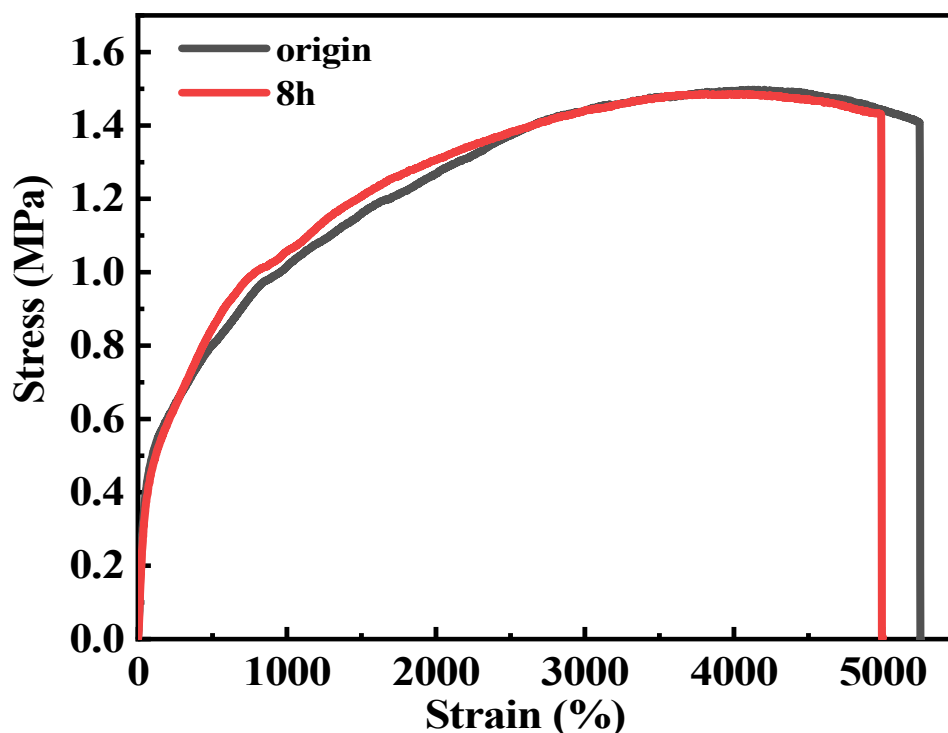

Fig. S10 Stress-strain curve of PPG-HD-PA which self-healed at room temperature for 8 h.

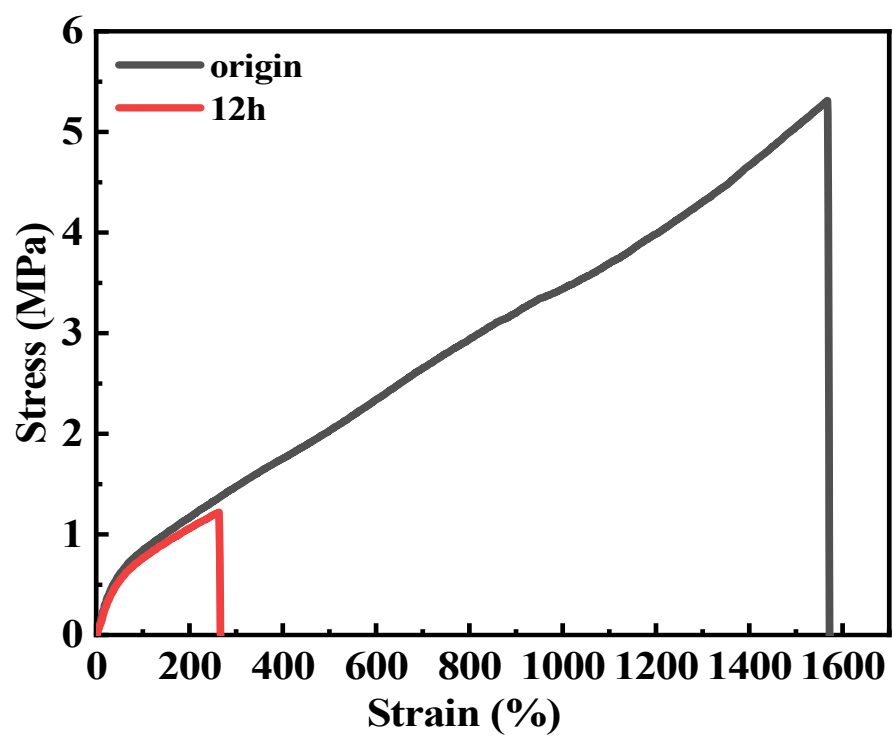

Fig. S11 Stress-strain curve of PPG-MD-PA which self-healed at room temperature for 12 h.
